# Supplementary material for: Sri Lanka Malaria Maps
Source: Springer Nature journal article supplement (doi:10.1186/1475-2875-2-22), 2003-07-22
Supplement: Additional file 4 [file 1475-2875-2-22-s4.pdf]

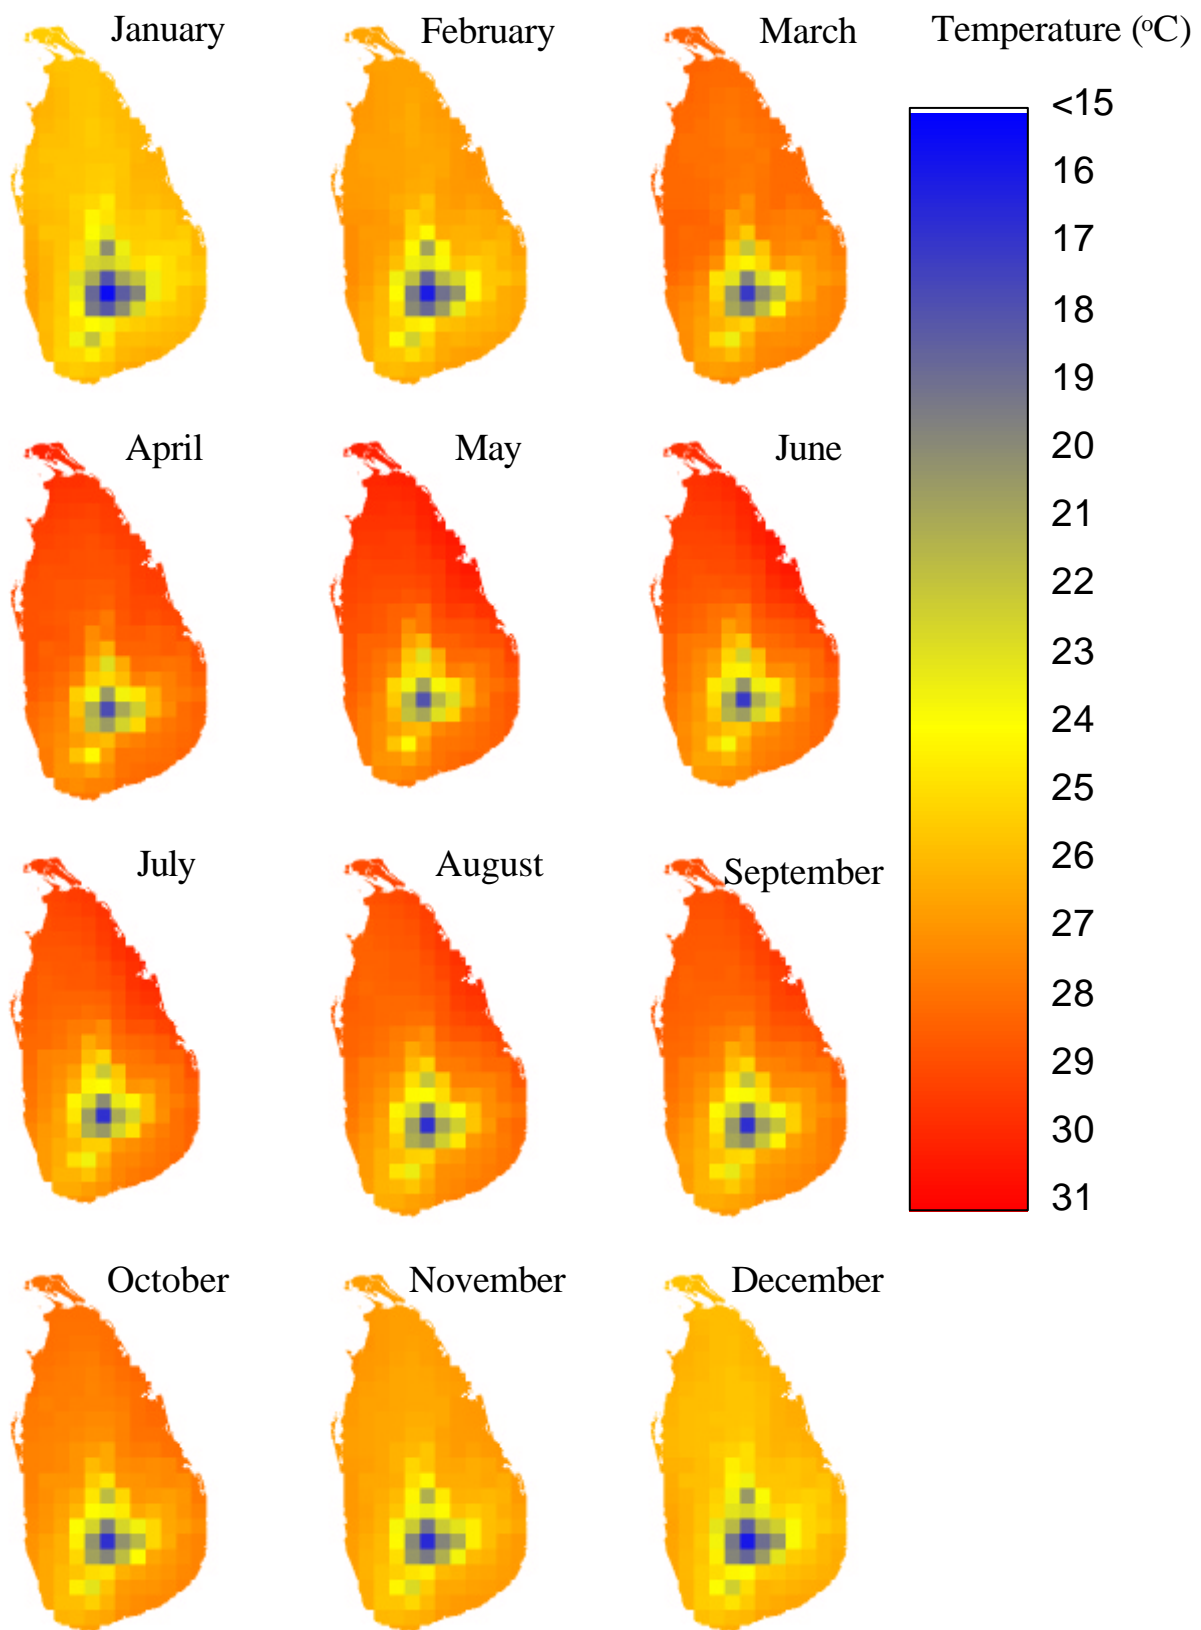

Additional file 3 - Temperature

Source: IWMI World Water and Climate Atlas

(<http://www.iwmi.cgiar.org/WAtlas/atlas.htm>)
